# Supplementary material
Source: PubMed Central journal article supplement (PMC4348327)
Supplement: NIHMS648271-supplement-Table_1.pdf [file NIHMS648271-supplement-Table_1.pdf]

**Supplemental Table 1. Treatment-emergent AEs (safety population)**

| AE                                                                             | 400 mg QD | 400 mg QD<br>FED | 200 mg BID | 600 mg QD | 300 mg BID | 900 mg QD | 1200 mg QD | Total   |
|--------------------------------------------------------------------------------|-----------|------------------|------------|-----------|------------|-----------|------------|---------|
| n (%)                                                                          | (N=7)     | (N=5)            | (N=3)      | (N=4)     | (N=7)      | (N=3)     | (N=16)     | (N=45)  |
| <b>Treatment-emergent AEs of all grades reported in ≥20% of patients</b>       |           |                  |            |           |            |           |            |         |
| Rash <sup>‡</sup>                                                              | 4 (57)    | 0 (0)            | 1 (33)     | 2 (50)    | 5 (71)     | 1 (33)    | 10 (62)    | 23 (51) |
| Diarrhea                                                                       | 4 (57)    | 1 (20)           | 2 (67)     | 2 (50)    | 1 (14)     | 1 (33)    | 9 (56)     | 20 (44) |
| Anorexia                                                                       | 2 (29)    | 1 (20)           | 1 (33)     | 0 (0)     | 4 (57)     | 2 (67)    | 6 (38)     | 16 (36) |
| Fatigue                                                                        | 1 (14)    | 2 (40)           | 1 (33)     | 0 (0)     | 2 (29)     | 2 (67)    | 7 (44)     | 15 (33) |
| Anemia                                                                         | 2 (29)    | 1 (20)           | 2 (67)     | 1 (25)    | 2 (29)     | 2 (67)    | 3 (19)     | 13 (29) |
| Prolonged ECG QT                                                               | 0 (0)     | 1 (20)           | 3 (100)    | 0 (0)     | 2 (29)     | 2 (67)    | 4 (25)     | 12 (27) |
| Pyrexia                                                                        | 1 (14)    | 0 (0)            | 0 (0)      | 1 (25)    | 2 (29)     | 0 (0)     | 7 (44)     | 11 (24) |
| Increased ALT                                                                  | 1 (14)    | 1 (20)           | 1 (33)     | 1 (25)    | 1 (14)     | 0 (0)     | 5 (31)     | 10 (22) |
| Dyspnea                                                                        | 1 (14)    | 2 (40)           | 0 (0)      | 1 (25)    | 2 (29)     | 0 (0)     | 4 (25)     | 10 (22) |
| Dry skin                                                                       | 2 (29)    | 0 (0)            | 1 (33)     | 2 (50)    | 0 (0)      | 1 (33)    | 4 (25)     | 10 (22) |
| Peripheral                                                                     | 1 (14)    | 1 (20)           | 0 (0)      | 1 (25)    | 1 (14)     | 0 (0)     | 6 (38)     | 10 (22) |
| Nausea                                                                         | 0 (0)     | 1 (20)           | 0 (0)      | 1 (25)    | 1 (14)     | 1 (33)    | 5 (31)     | 9 (20)  |
| Constipation                                                                   | 0 (0)     | 1 (20)           | 1 (33)     | 1 (25)    | 4 (57)     | 0 (0)     | 2 (12)     | 9 (20)  |
| <b>Grade 3 treatment-emergent AEs reported in ≥5% of patients<sup>‡‡</sup></b> |           |                  |            |           |            |           |            |         |
| Prolonged ECG QT                                                               | 0 (0)     | 1 (20)           | 2 (67)     | 0 (0)     | 2 (29)     | 2 (67)    | 2 (12)     | 9 (20)  |
| Anemia                                                                         | 2 (29)    | 0 (0)            | 2 (67)     | 0 (0)     | 1 (14)     | 1 (33)    | 1 (6)      | 7 (16)  |
| Rash <sup>‡‡</sup>                                                             | 0 (0)     | 0 (0)            | 0 (0)      | 0 (0)     | 2 (29)     | 1 (33)    | 2 (12)     | 5 (11)  |
| Diarrhea                                                                       | 1 (14)    | 0 (0)            | 0 (0)      | 0 (0)     | 0 (0)      | 0 (0)     | 3 (19)     | 4 (9)   |
| Asthenia                                                                       | 0 (0)     | 1 (20)           | 0 (0)      | 0 (0)     | 2 (29)     | 0 (0)     | 1 (6)      | 4 (9)   |
| Neutropenia                                                                    | 2 (29)    | 0 (0)            | 1 (33)     | 0 (0)     | 0 (0)      | 0 (0)     | 0 (0)      | 3 (7)   |
| Febrile neutropenia                                                            | 0 (0)     | 1 (20)           | 0 (0)      | 0 (0)     | 0 (0)      | 0 (0)     | 2 (12)     | 3 (7)   |

‡Includes MeDRA preferred terms of rash (rash, rash maculo-papular, rash pruritic, rash macular, rash popular, rash erythematous), acne and dermatitis acneiform

‡‡No grade 4 treatment-emergent AEs were reported in  $\geq 5\%$  of patients
