# Supplementary material
Source: PubMed Central journal article supplement (PMC4348327)
Supplement: NIHMS648271-supplement-Table_2.pdf [file NIHMS648271-supplement-Table_2.pdf]

**Supplemental Table 2. Dose escalation PK parameters for ARRY-614**

| Dose (mg)                | Study Day   | N | T <sub>max</sub> <sup>a,c</sup><br>hr | C <sub>max</sub> <sup>b</sup><br>ng/mL | AUC <sub>tau</sub> <sup>b</sup><br>ng*hr/mL | R <sub>AUC</sub> <sup>b</sup> |
|--------------------------|-------------|---|---------------------------------------|----------------------------------------|---------------------------------------------|-------------------------------|
| <b>Fasted Cohorts</b>    |             |   |                                       |                                        |                                             |                               |
| 200 mg BID               | 1           | 3 | 3 (3 – 3)                             | 258 (118)                              | 1400 (195)                                  |                               |
|                          | 15          | 2 | 2 (1 – 3)                             | 380 (NC)                               | 1770 (NC)                                   | 0.879 (NC)                    |
| 300 mg BID               | 1           | 5 | 3 (3 – 6)                             | 543 (188)                              | 2620 (155)                                  |                               |
|                          | 15          | 6 | 3 (1 – 6)                             | 843 (114)                              | 4860 (113)                                  | 2.07 (103)                    |
| 400 mg QD                | 1           | 7 | 3 (1 – 3)                             | 548 (66.5)                             | 3750 (73.0)                                 |                               |
|                          | 15          | 6 | 3 (3 – 6)                             | 713 (65.2)                             | 5840 (71.3)                                 | 1.70 (99.8)                   |
| 600 mg QD                | 1           | 4 | 3 (1 – 3)                             | 1040 (63.3)                            | 4890 (67.5)                                 |                               |
|                          | 15          | 4 | 3 (1 – 8)                             | 944 (164)                              | 7150 (104)                                  | 1.46 (27.2)                   |
| 900 mg QD                | 1           | 3 | 3 (3 – 6)                             | 751 (77.8)                             | 6300 (143)                                  |                               |
|                          | 15          | 3 | 3 (3 – 3)                             | 567 (206)                              | 5390 (385)                                  | 0.856 (82.4)                  |
| 1200 mg QD               | 1           | 6 | 3 (3 – 8)                             | 1580 (59.9)                            | 16100(59.2)                                 |                               |
|                          | 15          | 5 | 3 (0 – 24)                            | 2050 (47.1)                            | 19600 (38.4)                                | 1.13 (88.1)                   |
| <b>Fed/Fasted Cohort</b> |             |   |                                       |                                        |                                             |                               |
| 400 mg QD                | -3 (Fasted) | 5 | 3 (3 – 3)                             | 783 (125)                              | 4520 (117)                                  |                               |

|         |   |              |           |            |
|---------|---|--------------|-----------|------------|
| 1 (Fed) | 5 | 7.50 (6 – 8) | 387 (159) | 3780 (194) |
|---------|---|--------------|-----------|------------|

---

NC = Not Calculated ( $n \leq 2$ )

<sup>a</sup> Parameters presented as median (range)

<sup>b</sup> Parameters presented as geometric mean (geometric %CV)

<sup>c</sup> Values presented as Nominal Time
